# Supplementary material
Source: Atypon-hosted journal article supplement (https://www.cornous.com/downloadsupplementory/264)
Supplement: 264 [file 264]

**Supplementary File 1.** Different types of secondary structures in DPP-4 protein along with AA residues

| Sl. No. | Types Of Secondary Structure | Aa Residues | Total No of amino acid residues |
| --- | --- | --- | --- |
| 1 | Coil | Thr39, Arg40 | 2 |
| 2 | Sheet | Lys41, Thr42 | 2 |
| 3 | Coil | Tyr43, Thr44 | 2 |
| 4 | Helix | Leu45, Thr46, Asp47, Tyr48, Leu49, Lys50 | 6 |
| 5 | Turn | Asn51 | 1 |
| 6 | Coil | Thr52, Tyr53, Arg54, Leu55, Lys56, Leu57, Tyr58, Ser59, Leu60 | 9 |
| 7 | Sheet | Arg61, Trp62 | 2 |
| 8 | Coil | Ile63, Ser64, Asp65, His66 | 4 |
| 9 | Sheet | Glu67, Tyr68, Leu69, Tyr70, Lys71 | 5 |
| 10 | Coil | Gln72 | 1 |
| 11 | Turn | Glu73, Asn74 | 2 |
| 12 | Coil | Asn75 | 1 |
| 13 | Sheet | Ile76, Leu77, Val78, Phe79, Asn80 | 5 |
| 14 | Turn | Ala81, Glu82, Tyr83 | 3 |
| 15 | Coil | Gly84, Asn85 | 2 |
| 16 | Sheet | Ser86, Ser87, Val88, Phe89, Leu90 | 5 |
| 17 | Coil | Glu91 | 1 |
| 18 | Helix | Asn92, Ser93, Thr94, Phe95 | 4 |
| 19 | Turn | Asp96, Glu97 | 2 |
| 20 | Coil | Phe98, Gly99, His100, Ser101 | 4 |
| 21 | Sheet | Ile102, Asn103, Asp104, Tyr105, Ser106, Ile107 | 6 |
| 22 | Coil | Ser108 | 1 |
| 23 | Turn | Pro109, Asp110 | 2 |
| 24 | Coil | Gly111, Gln112 | 2 |
| 25 | Sheet | Phe113, Ile114, Leu115, Leu116, Glu117, Tyr118, Asn119, Tyr120, Val121, Lys122 | 10 |
| 26 | Coil | Gln123, Trp124, Arg125, His126, Ser127 | 5 |
| 27 | Sheet | Tyr128, Thr129, Ala130, Ser131, Tyr132, Asp133, Ile134, Tyr135, Asp136 | 9 |
| 28 | Turn | Leu137, Asn138, Lys139, Arg140 | 4 |
| 29 | Sheet | Gln141, Leu142 | 2 |
| 30 | Coil | Ile143, Thr144, Glu145, Glu146, Arg147, Ile148, Pro149 | 7 |
| 31 | Turn | Asn150, Asn151 | 2 |
| 32 | Sheet | Thr152, Gln153, Trp154, Val155, Thr156, Trp157 | 6 |
| 33 | Coil | Ser158, Pro159, Val160, Gly161, His162, Lys163 | 6 |
| 34 | Sheet | Leu164, Ala165, Tyr166, Val167, Trp168 | 5 |
| 35 | Turn | Asn169, Asn170 | 2 |
| 36 | Coil | Asp171 | 1 |
| 37 | Sheet | Ile172, Tyr173, Val174, Lys175 | 4 |
| 38 | Coil | Ile176, Glu177 | 2 |
| 39 | Turn | Pro178, Asn179 | 2 |
| 40 | Coil | Leu180, Pro181, Ser182 | 3 |
| 41 | Sheet | Tyr183, Arg184 | 2 |
| 42 | Coil | Ile185, Thr186, Trp187, Thr188, Gly189, Lys190 | 6 |
| 43 | Turn | Glu191, Asp192, Ile193 | 3 |
| 44 | Sheet | Ile194, Tyr195, Asn196 | 3 |
| 45 | Coil | Gly197, Ile198, Thr199, Asp200 | 4 |
| 46 | Helix | Trp201, Val202, Tyr203, Glu204, Glu205, Glu206 | 6 |
| 47 | Turn | Val207 | 1 |
| 48 | Coil | Phe208, Ser209, Ala210, Tyr211, Ser212, Ala213 | 6 |
| 49 | Sheet | Leu214, Trp215, Trp216 | 3 |
| 50 | Coil | Ser217 | 1 |
| 51 | Turn | Pro218, Asn219 | 2 |
| 52 | Coil | Gly220, Thr221 | 2 |
| 53 | Sheet | Phe222, Leu223, Ala224, Tyr225, Ala226, Gln227, Phe228, Asn229 | 8 |
| 54 | Coil | Asp230 | 1 |
| 55 | Turn | Thr231, Glu232 | 2 |
| 56 | Coil | Val233, Pro234 | 2 |
| 57 | Sheet | Leu235, Ile236, Glu237, Tyr238, Ser239, Phe240 | 6 |
| 58 | Coil | Tyr241, Ser242, Asp243 | 3 |
| 59 | Turn | Glu244, Ser245 | 2 |
| 60 | Coil | Leu246, Gln247, Tyr248, Pro249 | 4 |
| 61 | Sheet | Lys250, Thr251, Val252, Arg253, Val254, Pro255, | 6 |
| 62 | Coil | Tyr256, Pro257, Lys258 | 3 |
| 63 | Turn | Ala259, Gly260 | 2 |
| 64 | Coil | Ala261, Val262, Asn263, Pro264 | 4 |
| 65 | Sheet | Thr265, Val266, Lys267, Phe268, Phe269, Val270, Val271, Asn272 | 8 |
| 66 | Turn | Thr273, Asp274 | 2 |
| 67 | Coil | Ser275, Leu276, Ser277, Ser278, Val279, Thr280, Asn281, Ala282, Thr283 | 9 |
| 68 | Sheet | Ser284, Ile285, Gln286 | 3 |
| 69 | Coil | Ile287, Thr288, Ala289, Pro290 | 4 |
| 70 | Helix | Ala291, Ser292, Met293, Leu294 | 4 |
| 71 | Turn | Ile295 | 1 |
| 72 | Coil | Gly296, Asp297 | 2 |
| 73 | Sheet | His298, Tyr299, Leu300, Cys301, Asp302, Val303, Thr304, Trp305 | 8 |
| 74 | Coil | Ala306, Thr307 | 2 |
| 75 | Turn | Gln308, Glu309 | 2 |
| 76 | Sheet | Arg310, Ile311, Ser312, Leu313, Gln314, Trp315, Leu316, Arg317 | 8 |
| 77 | Coil | Arg318, Ile319 | 2 |
| 78 | Turn | Gln320, Asn321 | 2 |
| 79 | Sheet | Tyr322, Ser323, Val324, Met325, Asp326, Ile327, Cys328, Asp329, Tyr330, Asp331 | 10 |
| 80 | Turn | Glu332, Ser333, Ser334, Gly335 | 4 |
| 81 | Sheet | Arg336, Trp337, Asn338, Cys339 | 3 |
| 82 | Coil | Leu340 | 1 |
| 83 | Helix | Val341, Ala342, Arg343 | 3 |
| 84 | Coil | Gln344 | 1 |
| 85 | Sheet | His345, Ile346, Glu347, Met348 | 4 |
| 86 | Coil | Ser349, Thr350, Thr351, Gly352, Trp353, Val354, Gly355, Arg356, Phe357, Arg358, Pro359, Ser360, Glu361, Pro362 | 14 |
| 87 | Sheet | His363, Phe364 | 2 |
| 88 | Coil | Thr365 | 1 |
| 89 | Turn | Leu366, Asp367 | 2 |
| 90 | Coil | Gly368, Asn369 | 2 |
| 91 | Sheet | Ser370, Phe371, Tyr372, Lys373, Ile374, Ile375, Ser376 | 7 |
| 92 | Coil | Asn377 | 1 |
| 93 | Turn | Glu378, Glu379 | 2 |
| 94 | Coil | Gly380, Tyr381 | 2 |
| 95 | Sheet | Arg382, His383, Ile384, Cys385, Tyr386, Phe387, Gln388 | 7 |
| 96 | Turn | Ile389, Asp390 | 2 |
| 97 | Coil | Lys391, Lys392, Asp393, Cys394 | 4 |
| 98 | Sheet | Thr395, Phe396 | 2 |
| 99 | Coil | Ile397, Thr398, Lys399, Gly400, Thr401, Trp402, Glu403 | 7 |
| 100 | Sheet | Val404, Ile405, Gly406, Ile407, Glu408, Ala409, Leu410 | 7 |
| 101 | Coil | Thr411, Ser412, Asp413 | 3 |
| 102 | Sheet | Tyr414, Leu415, Tyr416, Tyr417, Ile418, Ser419 | 6 |
| 103 | Coil | Asn420, Glu421 | 2 |
| 104 | Helix | Tyr422, Lys423, Gly424 | 3 |
| 105 | Coil | Met425 | 1 |
| 106 | Turn | Pro426, Gly427 | 2 |
| 107 | Coil | Gly428, Arg429 | 2 |
| 108 | Sheet | Asn430, Leu431, Tyr432, Lys433, Ile434, Gln435 | 6 |
| 109 | Turn | Leu436, Ser437 | 2 |
| 110 | Coil | Asp438 | 1 |
| 111 | Turn | Tyr439, Thr440 | 2 |
| 112 | Coil | Lys441 | 1 |
| 113 | Sheet | Val442, Thr443, Cys444 | 3 |
| 114 | Coil | Leu445, Ser446 | 2 |
| 115 | Turn | Cys447, Glu448 | 2 |
| 116 | Coil | Leu449, Asn450 | 2 |
| 117 | Turn | Pro451, Glu452, Arg453 | 3 |
| 118 | Sheet | Cys454, Gln455, Tyr456, Tyr457, Ser458, Val459, Ser460, Phe461 | 8 |
| 119 | Coil | Ser462 | 1 |
| 120 | Turn | Lys463, Glu464 | 2 |
| 121 | Coil | Ala465, Lys466 | 2 |
| 122 | Sheet | Tyr467, Tyr468, Gln469, Leu470, Arg471, Cys472, Ser473, Gly474, Pro475 | 9 |
| 123 | Coil | Gly476, Leu477, Pro478 | 3 |
| 124 | Sheet | Leu479, Tyr480, Thr481, Leu482, His483, Ser484 | 6 |
| 125 | Turn | Ser485, Val486, Asn487, Asp488 | 4 |
| 126 | Sheet | Lys489, Gly490, Leu491, Arg492, Val493, Leu494, Glu495 | 7 |
| 127 | Coil | Asp496, Asn497 | 2 |
| 128 | Helix | Ser498, Ala499, Leu500, Asp501, Lys502, Met503, Leu504 | 7 |
| 129 | Turn | Gln505, Asn506 | 2 |
| 130 | Sheet | Val507, Gln508 | 2 |
| 131 | Coil | Met509, Pro510 | 2 |
| 132 | Sheet | Ser511, Lys512, Lys513, Leu514, Asp515, Phe516, Ile517, Ile518 | 8 |
| 133 | Coil | Leu519 | 1 |
| 134 | Turn | Asn520, Glu521 | 2 |
| 135 | Coil | Thr522 | 1 |
| 136 | Sheet | Lys523, Phe524, Trp525, Tyr526, Gln527, Met528, Ile529, Leu530 | 8 |
| 137 | Coil | Pro531 | 1 |
| 138 | Turn | Pro532, His533 | 2 |
| 139 | Coil | Phe534, Asp535 | 2 |
| 140 | Turn | Lys536, Ser537 | 2 |
| 141 | Coil | Lys538, Lys539 | 2 |
| 142 | Sheet | Tyr540, Pro541, Leu542, Leu543, Leu544, Asp545, Val546 | 7 |
| 143 | Coil | Tyr547, Ala548, Gly549 | 3 |
| 144 | Turn | Pro550, Cys551 | 2 |
| 145 | Coil | Ser552, Gln553, Lys554, Ala555, Asp556, Thr557, Val558, Phe559, Arg560, Leu561, Asn562 | 11 |
| 146 | Helix | Trp563, Ala564, Thr565, Tyr566, Leu567, Ala568, Ser569 | 7 |
| 147 | Turn | Thr570, Glu571 | 2 |
| 148 | Coil | Asn572, Ile573 | 2 |
| 149 | Sheet | Ile574, Val575, Ala576, Ser577, Phe578, Asp579 | 6 |
| 150 | Coil | Gly580 | 1 |
| 151 | Turn | Arg581, Gly582 | 2 |
| 152 | Coil | Ser583, Gly584, Tyr585, Gln586, Gly587 | 5 |
| 153 | Helix | Asp588, Lys589, Ile590, Met591, His592, Ala593, Ile594 | 7 |
| 154 | Turn | Asn595, Arg596 | 2 |
| 155 | Coil | Arg597 | 1 |
| 156 | Turn | Leu598, Gly599 | 2 |
| 157 | Coil | Thr600 | 1 |
| 158 | Helix | Phe601, Glu602, Val603, Glu604, Asp605, Gln606, Ile607, Glu608, Ala609, Ala610, Arg611, Gln612, Phe613, Ser614 | 14 |
| 159 | Turn | Lys615 | 1 |
| 160 | Coil | Met616 | 1 |
| 161 | Turn | Gly617, Phe618 | 2 |
| 162 | Sheet | Val619, Asp620, Asn621, Lys622, Arg623, Ile624, Ala625, Ile626, Trp627, Gly628, Trp629 | 11 |
| 163 | Turn | Ser630 | 1 |
| 164 | Helix | Tyr631, Gly632, Gly633, Tyr634, Val635, Thr636, Ser637, Met638, Val639, Leu640 | 10 |
| 165 | Turn | Gly641, Ser642, Gly643 | 3 |
| 166 | Coil | Ser644, Gly645, Val646, Phe647, Lys648 | 5 |
| 167 | Sheet | Cys649, Gly650, Ile651, Ala652, Val653 | 5 |
| 168 | Coil | Ala654, Pro655, Val656, Ser657, Arg658 | 5 |
| 169 | Helix | Trp659, Glu660, Tyr661 | 3 |
| 170 | Coil | Tyr662, Asp663 | 2 |
| 171 | Helix | Ser664, Val665, Tyr666, Thr667, Glu668, Arg669, Tyr670, Met671 | 8 |
| 172 | Coil | Gly672, Leu673, Pro674, Thr675 | 4 |
| 173 | Turn | Pro676, Glu677, Asp678, Asn679 | 4 |
| 174 | Helix | Leu680, Asp681, His682, Tyr683, Arg684, Asn685 | 6 |
| 175 | Coil | Ser686, Thr687, Val688 | 3 |
| 176 | Helix | Met689, Ser690, Arg691 | 3 |
| 177 | Turn | Ala692 | 1 |
| 178 | Helix | Glu693, Asn694, Phe695, Lys696, Gln697 | 5 |
| 179 | Coil | Val698 | 1 |
| 180 | Sheet | Glu699, Tyr700, Leu701, Leu702, Ile703, His704, Gly705 | 7 |
| 181 | Turn | Thr706, Ala707 | 2 |
| 182 | Coil | Asp708 | 1 |
| 183 | Turn | Asp709, Asn710, Val711, His712 | 4 |
| 184 | Helix | Phe713, Gln714, Gln715, Ser716, Ala717, Gln718, Ile719, Ser720, Lys721, Ala722, Leu723, Val724, Asp725, Val726 | 14 |
| 185 | Turn | Gly727 | 1 |
| 186 | Coil | Val728, Asp729, Phe730 | 3 |
| 187 | Sheet | Gln731, Ala732, Met733, Trp734, Tyr735 | 5 |
| 188 | Turn | Thr736, Asp737 | 2 |
| 189 | Coil | Glu738, Asp739 | 2 |
| 190 | Turn | His740, Gly741 | 2 |
| 191 | Coil | Ile742, Ala743, Ser744 | 3 |
| 192 | Helix | Ser745, Thr746, Ala747, His748, Gln749, His750, Ile751, Tyr752, Thr753, His754, Met755, Ser756, His757, Phe758, Ile759, Lys760, Gln761, Cys762 | 18 |
| 193 | Turn | Phe763, Ser764 | 2 |
| 194 | Coil | Leu765, Pro766 | 2 |
