# Supplementary material
Source: Atypon-hosted journal article supplement (https://www.cornous.com/downloadsupplementory/264)
Supplement: 264 [file Supplementary File 2.doc]

**Table 1. List of p**hytocompounds having DPP-4 inhibitory properties along with plant source

| **Name of the plants** | **Compounds** | **References** |
| --- | --- | --- |
| Reference Drugs | 1. Saxagliptin  2. Alogliptin  3. Sitagliptin  4. Vildagliptin | Drug Bank  https://go.drugbank.com/ |
| *Rubus fruticosus* L. | 1. Cyanidin | Fan et al. (2013) |
| *Brassica oleracea* L. | 2. Luteolin |  |
| *Acacia auriculiformis* A. Cunn. ex Benth | 3. Apigenin |  |
| *Citrus aurantium* L. | 4. Naringenin  5. Hesperetin |  |
| *Citrus limon* (L.) Osbeck | 6. Eriocitrin |  |
| *Psoralea corylifolia* L. | 7. Genistein  8. Resveratrol |  |
| *Camellia sinensis* (L.) Kuntze | 9. Epigallocatechin gallate  10. Gallic acid |  |
| *Coffea arabica* L. | 11. Caffeic acid |  |
| *Quercus alba* L. | 12. Quercetin |  |
| *Vaccinum corymbosum* L. | 13. Cyanidin-3-glucoside | Casedas et al. (2018) |
| *Anagallis monelli* (L.) U. Manns and Anderb | 14. Hispidulin  15. Kaempferol  16. Flavone  17. Luteolin 7-O-glucoside  18. 6-Hydroxyluteolin 7-glucoside | Kalhotra et al. (2018) |
| *Apocynum cannabinum* L. | 19. Isoquercetin | Zhang (2018) |
| *Lippia graveolens* Kunth | 20. Eriodictyol | Bower et al. (2014) |
| *Rosamarinus officinalis* L. | 21. Cirsimaritin  22. Rosmarinic acid |  |
| *Citrus maxima* (Burm.) Merr | 23. Naringin | Parmar et al. (2012) |
| *Coptis chinensis* French. | 24. Berberine | Al-masri et al. (2009) |
| *Inonotus obliquus* | 25. (2R-4S-5S-7S)-5-amino-N-butyl-4-hydroxy-7-{[3-(3-hydroxypropoxy)-4-methoxyphenyl]methyl}-2-8-dimethylnonanamide | Geng et al. (2013) |
| *Castanospermum austral* A. Cunn. and C. Fraser | 26. Castanospermine  27. 7-Deoxy-6-epi-castanospermine  28. Australine | Bharti et al. (2012) |
| *Fagonia cretica* L. | 29. Quinovic acid-3β-O-β-D-glycopyranoside  30. Quinovic acid 3-O-(6-deoxy-beta-D-glucopyranoside) 28-O-beta-D-glucopyranosyl ester  31. Stigmasterol | Saleem et al. (2014) |
| *Hedera nepalensis* K. Koch | 32. Lupeol |  |
| *Fagopyrum esculentum* Moench | 33. Catechins | Wang et al. (2015) |
| *Rheum palmatum* L. | 34. Emodin |  |
| *Lens culinaris* Medikus | 35. Kaempferol 3-7-diglucoside  36. Kaempferol 3-4'-diglucoside  37. Robinin | Kim et al. (1998) |
| *Vitis thunbergii* var. taiwaniana | 38. Hopeaphenol  39. Vitisin A  40. Vitisin B | Lin et al. (2015) |
| *Synsepalum dulcificum* | 41. Astragalin  42. Nialamide  43. N-Acetyl-L-phenylalanine  44. S-[6]- Gingerol | Zollapi et al. (2023) |
| *Eucalyptus globulus* | 45. Macrocarpal A  46. Macrocarpal B  47. Macrocarpal C | Kato et al. (2018) |
| *Urena lobata* | 48. 𝛃-sitosterol  49. Mangiferin  50. Chrysoeriol  51. Gossypetin | Pumomo et al. (2015) |
| *Smilax china* L. | 52. Kaempferide  53. Kaempferin  54. Morin  55. Kaempferitrin  56. Quercetin 3-3'-diglucoside  57. Vitexin  58. Lepidoside  59. Rutin  60. Pratensein  61. Puerarin  62. 1,3,6-trihydroxy xanthone | Zhao et al. (2016) |
| *Helichrysum arenarium* | 63. Arenariumoside I  64. Arenariumoside II  65. Arenariumoside IV  66. Arenariumoside III  67. Chalconaringenin 2'-O-glucoside 4'-O-gentobioside 2'_O_glucoside 4'_O_gentobioside  68. Apigenin-7-O-gentiobioside  69. Apigenin 7-O-methylglucuronide  70. Apigenin 7-O-glucoside | Morikawa et al. (2015) |
| *Aronia* sp. (chokeberry) | 71. Cyanidin 3,5-diglucoside | Kozuka et al. (2015) |
| *Vitis vinifera* | 72. Procyanidin | Gonzalez-Abuin et al. (2012) |
| *Rosa gallica* | 73. Rugosin A | Kato et al. (2016) |
| *Phaseous vulgaris* | 74. Malvidin  75. Delphinidin | Mojica et al. (2017) |
| *Erythrina* sp. | 76. N-Nororientaline | Guasch et al. (2012) |
| *Tecoma stans* | 77. Tecostamine  78. Tecomine | Guasch et al. (2012) |
| *Scoparia dulcis* | 79. Epinephrine | Ly et al. (2011) |
| *Ephedra distachya*  *Ephedra alata* | 80. (+)-pseudoephedrine  81. (-)-ephedrine | Guasch et al. (2012) |
| *Vitis vinifera* | 82. Epicatechin | Guasch et al. (2012) |
| *Galega orientalis* | 83. Hydroxysmirnovine | Benn et al. (1996) |
| *Pennisetum typhoideum* | 84. Isochanoclavin-I | Brack et al. (1962) |
