# Supplementary material
Source: Atypon-hosted journal article supplement (https://www.cornous.com/downloadsupplementory/264)
Supplement: 264 [file Supplementary File 3.doc]

**Supplementary File 3. Binding energies of four reference drugs (previous 4) and 94 phytocompounds and their mean ± SD**

| SL no. | **Compounds** | **Binding Affinity (kcal/mole))** | | | | **Mean ± SD** |
| --- | --- | --- | --- | --- | --- | --- |
| **1** | **2** | **3** | **Mean** |
| 1. | Sitagliptin | -8.6 | -8.5 | -8.2 | -8.43 | -8.43 ± 0.21 |
| 2. | Saxagliptin | -8.5 | -8.4 | -8.2 | -8.37 | -8.37 ± 0.15 |
| 3. | Vildagliptin | -7.3 | -7.9 | -7.9 | -7.7 | -7.70 ± 0.35 |
| 4. | Alogliptin | -6.9 | -7.4 | -7.4 | -7.23 | -7.23 ± 0.29 |
| 5. | Robinin | -10.4 | -10.4 | -10.4 | -10.4 | -10.40 |
| 6. | Eriocitrin | -9.4 | -9.8 | -10.7 | -9.97 | -9.97 ± 0.67 |
| 7. | Rugosin A | -9.9 | -10.2 | -9.8 | -9.97 | -9.96 ± 0.21 |
| 8. | Apigenin-7-O-gentiobioside | -9.5 | -10.3 | -9.6 | -9.8 | -9.8 ± 0.44 |
| 9. | Arenariumoside II | -9.9 | -9.9 | -9.4 | -9.73 | -9.73 ± 0.29 |
| 10. | Arenariumoside I | -9.1 | -9.7 | -9.7 | -9.5 | -9.5 ± 0.35 |
| 11. | Kaempferitrin | -9.1 | -9.6 | -9.6 | -9.43 | -9.43 ± 0.29 |
| 12. | Lepidoside | -9.8 | -9.1 | -9.3 | -9.4 | -9.4 ± 0.36 |
| 13. | Chalconaringenin 2'-O-glucoside 4'-O-gentobioside | -9.4 | -9.1 | -9.5 | -9.33 | -9.33 ± 0.21 |
| 14. | Naringin | -9.3 | -9.3 | -9.3 | -9.3 | -9.30 |
| 15. | Quercetin 3-3'-diglucoside | -8.9 | -9.6 | -9.2 | -9.23 | -9.23 ± 0.35 |
| 16. | Rutin | -8.5 | -9.5 | -9.5 | -9.17 | -9.17 ± 0.58 |
| 17. | Apigenin 7-O-methylglucuronide | -9.2 | -8.9 | -9.2 | -9.1 | -9.1 ± 0.17 |
| 18. | Arenariumoside IV | -8.8 | -9.5 | -8.8 | -9.03 | -9.03 ± 0.40 |
| 19. | Quinovic acid-3β-O-β-D-glycopyranoside | -9 | -9 | -9 | -9 | -9 |
| 20. | Apigenin 7-O-glucoside | -8.8 | -9 | -9.1 | -8.97 | -8.97 ± 0.15 |
| 21. | Luteolin | -9.1 | -9.1 | -8.5 | -8.9 | -8.9 ± 0.35 |
| 22. | Arenariumoside III | -8.6 | -9.1 | -8.9 | -8.87 | -8.87 ± 0.25 |
| 23. | Lupeol | -8.9 | -8.8 | -8.8 | -8.83 | -8.83 ± 0.06 |
| 24. | Luteolin 7-O-glucoside | -8.8 | -8.8 | -8.9 | -8.83 | -8.83 ± 0.06 |
| 25. | 6-Hydroxyluteolin 7-glucoside | -8.8 | -8.9 | -8.7 | -8.8 | -8.8 ± 0.1 |
| 26. | Vitexin | -8.8 | -8.8 | -8.8 | -8.8 | -8.8 |
| 27. | Kaempferol 3-4'-diglucoside | -8.6 | -8.6 | -9.2 | -8.8 | -8.8 ± 0.35 |
| 28. | Eriodictyol | -8.8 | -8.7 | -8.8 | -8.77 | -8.77 ± 0.06 |
| 29. | Kaempferol 3-7-diglucoside | -8.6 | -8.8 | -8.8 | -8.73 | -8.73 ± 0.11 |
| 30. | Quinovic acid 3-O-(6-deoxy-beta-D-glucopyranoside) 28-O-beta-D-glucopyranosyl ester | -8.7 | -8.7 | -8.7 | -8.7 | -8.7 |
| 31. | Cyanidin 3-5-diglucoside | -8.8 | -8.6 | -8.6 | -8.67 | -8.67 ± 0.11 |
| 32. | Quercetin | -8.6 | -8.6 | -8.8 | -8.67 | -8.67 ± 0.11 |
| 33. | Cyanidin | -8.4 | -8.7 | -8.4 | -8.5 | -8.5 ± 0.17 |
| 34. | Epicatechin | -8.5 | -8.5 | -8.5 | -8.5 | -8.5 |
| 35. | Genistein | -8.5 | -8.5 | -8.5 | -8.5 | -8.5 |
| 36. | Procyanidin | -8.6 | -8.3 | -8.6 | -8.5 | -8.5 ± 0.17 |
| 37. | Stigmasterol | -8.6 | -8.5 | -8.3 | -8.47 | -8.47 ± 0.15 |
| 38. | Gossypetin | -8.7 | -7.9 | -8.7 | -8.43 | -8.43 ± 0.46 |
| 39. | Astragalin | -8.4 | -8.5 | -8.4 | -8.43 | -8.43 ± 0.06 |
| 40. | Hispidulin | -8.4 | -8.4 | -8.4 | -8.4 | -8.4 |
| 41. | Kaempferin | -8.4 | -8.4 | -8.4 | -8.4 | -8.4 |
| 42. | Delphinidin | -8.3 | -8.4 | -8.4 | -8.37 | -8.37 ± 0.06 |
| 43. | Isoquercetin | -8.3 | -8.3 | -8.3 | -8.3 | -8.3 |
| 44. | Kaempferide | -7.4 | -8.8 | -8.7 | -8.3 | -8.3 ± 0.78 |
| 45. | Vitisin A | -8.5 | -8.2 | -8.1 | -8.27 | -8.27 ± 0.21 |
| 46. | Epigallocatechin gallate | -8.1 | -8.6 | -7.9 | -8.2 | -8.2 ± 0.36 |
| 47. | Chrysoeriol | -8.2 | -8.2 | -8.2 | -8.2 | -8.2 |
| 48. | Mangiferin | -8.3 | -8.1 | -8.1 | -8.17 | -8.17 ± 0.11 |
| 49. | Vitisin B | -8.4 | -8.4 | -7.7 | -8.17 | -8.16 ± 0.40 |
| 50. | Apigenin | -8.1 | -8.1 | -8.2 | -8.13 | -8.13 ± 0.06 |
| 51. | Rosmarinic acid | -7.7 | -8.3 | -8.4 | -8.13 | -8.13 ± 0.38 |
| 52. | Cyanidin-3-glucoside | -8.1 | -8.1 | -8.1 | -8.1 | -8.1 |
| 53. | Morin | -8.1 | -8.1 | -8.1 | -8.1 | -8.1 |
| 54. | Berberine | -8 | -8.1 | -8 | -8.03 | -8.0 ± 0.06 |
| 55. | Pratensein | -7.5 | -8.6 | -8 | -8.03 | -8.0 ± 0.55 |
| 56. | Puerarin | -7.9 | -8.3 | -7.9 | -8.03 | -8.0 ± 0.23 |
| 57. | Cirsimaritin | -8 | -8 | -8 | -8 | -8 |
| 58. | Hesperetin | -7.9 | -7.7 | -8.3 | -7.97 | -7.97 ± 0.30 |
| 59. | Catechins | -7.8 | -8.5 | -7.6 | -7.97 | -7.97 ± 0.47 |
| 60. | Hopeaphenol | -8 | -8 | -7.9 | -7.97 | -7.97 ± 0.06 |
| 61. | Emodin | -8 | -7.9 | -7.9 | -7.93 | -7.93 ± 0.06 |
| 62. | Naringenin | -7.9 | -7.9 | -7.9 | -7.9 | -7.9 |
| 63. | Kaempferol | -7.6 | -8.5 | -7.5 | -7.87 | -7.87 ± 0.55 |
| 64. | Beta-Sitosterol | -7.5 | -7.9 | -8 | -7.8 | -7.8 ± 0.26 |
| 65. | 1-3-6-Trihydroxy xanthone | -7.5 | -8 | -7.5 | -7.67 | -7.67 ± 0.29 |
| 66. | Macrocarpal B | -7.3 | -7.7 | -7.7 | -7.57 | -7.57 ± 0.23 |
| 67. | N-Nororientaline | -7.9 | -7.3 | -7.5 | -7.57 | -7.57 ± 0.30 |
| 68. | Flavone | -7.5 | -7.5 | -7.4 | -7.47 | -7.47 ± 0.06 |
| 69. | Nialamide | -8 | -7.4 | -6.9 | -7.43 | -7.43 ± 0.55 |
| 70. | Macrocarpal C | -7.4 | -7.4 | -7.4 | -7.4 | -7.4 |
| 71. | Malvidin | -7.5 | -7 | -7.5 | -7.33 | -7.33 ± 0.29 |
| 72. | Macrocarpal A | -7.2 | -7.3 | -7.4 | -7.3 | -7.3 ± 0.1 |
| 73. | Isochanoclavin-I | -6.8 | -7 | -7 | -6.93 | -6.93 ± 0.11 |
| 74. | Resveratrol | -6.8 | -6.9 | -7.1 | -6.93 | -6.93 ± 0.15 |
| 75. | Caffeic acid | -6.3 | -6.8 | -6.4 | -6.5 | -6.5 ± 0.26 |
| 76. | N-Acetyl-L-phenylalanine | -7 | -6.2 | -6.2 | -6.47 | -6.47 ± 0.46 |
| 77. | Tecostanine | -6 | -6.4 | -6.4 | -6.27 | -6.27 ± 0.23 |
| 78. | Gallic acid | -6.1 | -6.4 | -6 | -6.17 | -6.17 ± 0.21 |
| 79. | Tecomine | -6.1 | -6.1 | -6.1 | -6.1 | -6.1 |
| 80. | 7-deoxy-6-epi-castanospermine | -6 | -6 | -6 | -6 | -6 |
| 81. | Australine | -6 | -6 | -6 | -6 | -6 |
| 82. | Epinephrine | -6.1 | -5.9 | -6 | -6 | -6 ± 0.1 |
| 83. | Castanospermine | -5.9 | -6 | -6 | -5.97 | -5.97 ± 0.06 |
| 84. | (S)-6-gingerol | -5.6 | -6 | -5.9 | -5.83 | -5.83 ± 0.21 |
| 85. | (-)-ephedrine | -5.8 | -5.7 | -5.7 | -5.73 | -5.73± 0.06 |
| 86. | Hydroxysmirnovine | -5.4 | -5.8 | -5.9 | -5.7 | -5.7 ± 0.26 |
| 87. | (+)-pseudoephedrine | -5.6 | -5.6 | -5.7 | -5.63 | -5.63 ± 0.06 |
| 88. | (2R-4S-5S-7S)-5-amino-N-butyl-4-hydroxy-7-{[3-(3-hydroxypropoxy)-4-methoxyphenyl]methyl}-2-8-dimethylnonanamide | -5.8 | -5.5 | -5.5 | -5.6 | -5.6 ± 0.17 |
